# Supplementary material for: Isomerization barriers for the disrotatory and conrotatory isomerizations of 3-aza-benzvalene and 3,4-diaza-benzvalene to pyridine and pyridazine
Source: Royal Society of Chemistry journal article supplement (doi:10.1039/c3cp51283e), 2013-01-01
Supplement: c3cp51283e.pdf [file c3cp51283e.pdf]

**Cartesian Coordinates (Å) and Energies (hartrees) for each Structure  
Optimized at the MCSCF(10,10)/cc-pVDZ Level**

| <b>3-aza-benzvalene</b>  |               |               |               |
|--------------------------|---------------|---------------|---------------|
| Energy = -246.7154663140 |               |               |               |
| Atom                     | X             | Y             | Z             |
| C                        | -0.1815994766 | -1.0485834775 | 0.0000613526  |
| N                        | 1.2346014003  | -0.7167493816 | -0.0000593858 |
| C                        | 1.2465782656  | 0.5407334927  | -0.0001080355 |
| C                        | -0.1503141451 | 1.0898872167  | -0.0000264795 |
| C                        | -1.0027650956 | 0.0266487648  | -0.7399015920 |
| C                        | -1.0026501406 | 0.0267149615  | 0.7400720917  |
| H                        | -1.7641297465 | 0.0558601576  | 1.5017567301  |
| H                        | -1.7643609125 | 0.0557961657  | -1.5014695006 |
| H                        | -0.4130168259 | 2.1378767017  | -0.0000734290 |
| H                        | 2.1588363652  | 1.1248172012  | -0.0001979232 |
| H                        | -0.4696806882 | -2.0885128026 | 0.0001421712  |

  

| <b>pyridine</b>          |               |               |               |
|--------------------------|---------------|---------------|---------------|
| Energy = -246.8335888420 |               |               |               |
| Atom                     | X             | Y             | Z             |
| C                        | -0.0104074848 | -0.2982167003 | -0.3694931026 |
| C                        | -1.4163588156 | -0.3615808957 | -0.3910895238 |
| N                        | -2.2014649621 | 0.6671736738  | -0.2454980380 |
| C                        | -1.6413575875 | 1.8733056397  | -0.0622793872 |
| C                        | -0.2532223107 | 2.0830697750  | -0.0175317348 |
| C                        | 0.5959336354  | 0.9523875753  | -0.1772521803 |
| H                        | 1.6725491428  | 1.0537902955  | -0.1516232660 |
| H                        | 0.1480091135  | 3.0753596723  | 0.1332961260  |
| H                        | -2.3250149953 | 2.7039883469  | 0.0537419859  |
| H                        | 0.5781207527  | -1.1956585616 | -0.4978468357 |
| H                        | -1.9019250584 | -1.3204795210 | -0.5373228535 |

  

| <b>zezA</b>              |               |               |               |
|--------------------------|---------------|---------------|---------------|
| Energy = -246.6768613502 |               |               |               |
| Atom                     | X             | Y             | Z             |
| C                        | -0.1129303000 | -1.2675036200 | -0.3758114900 |
| C                        | 1.2051253300  | -0.7347731000 | 0.0883987500  |
| N                        | 1.2626760000  | 0.5311181500  | 0.1107546100  |
| C                        | 0.0620713500  | 1.2733526200  | -0.1518735300 |
| C                        | -1.2228401900 | 0.7648659900  | -0.0686515100 |
| C                        | -1.1391999700 | -0.6795949900 | 0.4010464000  |
| H                        | -1.0844870800 | -0.7937060000 | 1.4832979400  |
| H                        | -2.0934307600 | 1.4054759700  | -0.1129410700 |
| H                        | -0.2282171800 | -1.0840609100 | -1.4457099400 |
| H                        | 2.1006922700  | -1.3083677300 | 0.3047110700  |

| <b>zzeB</b>              |               |               |               |
|--------------------------|---------------|---------------|---------------|
| Energy = -246.6763884978 |               |               |               |
| Atom                     | X             | Y             | Z             |
| C                        | -0.1513292936 | -1.1761728072 | -0.3867517310 |
| N                        | 1.1813388529  | -0.8954897085 | 0.0593319305  |
| C                        | 1.2519052092  | 0.3718339281  | 0.0722962284  |
| C                        | 0.0770982659  | 1.2972581348  | -0.1647193077 |
| C                        | -1.2210774734 | 0.8387665372  | -0.0196876909 |
| C                        | -1.1690517935 | -0.6252106259 | 0.4195997298  |
| H                        | -1.0514333953 | -0.7426804568 | 1.4959027247  |
| H                        | -2.0774765567 | 1.5015941075  | -0.0160719934 |
| H                        | 0.2904752738  | 2.3467658139  | -0.3295923050 |
| H                        | -0.2595201724 | -1.0601839536 | -1.4636118768 |
| H                        | 2.2090295630  | 0.8344234303  | 0.3020734212  |

  

| <b>TSconA</b>            |               |               |               |
|--------------------------|---------------|---------------|---------------|
| Energy = -246.6328210294 |               |               |               |
| Atom                     | X             | Y             | Z             |
| C                        | -0.2346523702 | -1.0716255906 | -0.3757380427 |
| C                        | 1.1791242764  | -0.6734460632 | -0.0769009364 |
| N                        | 1.3162538330  | 0.5502888740  | 0.1982537691  |
| C                        | 0.0905920184  | 1.2719604498  | 0.0030489791  |
| C                        | -1.0924425451 | 0.5502637975  | -0.3043193750 |
| C                        | -1.2153067274 | -0.6932541080 | 0.6055527812  |
| H                        | -0.8403935632 | -0.5823023802 | 1.6200573995  |
| H                        | -1.8989207677 | 0.9306522643  | -0.9182717984 |
| H                        | 0.1778186777  | 2.3477116879  | -0.0367349692 |
| H                        | -0.5177965213 | -1.4103674503 | -1.3654123197 |
| H                        | 2.0374456894  | -1.3344604811 | -0.1190214876 |

  

| <b>TSconB</b>            |               |               |               |
|--------------------------|---------------|---------------|---------------|
| Energy = -246.6452685022 |               |               |               |
| Atom                     | X             | Y             | Z             |
| C                        | -0.2734587109 | -0.9990864809 | -0.3731431328 |
| N                        | 1.1255394845  | -0.8320170808 | -0.1333042187 |
| C                        | 1.2865016505  | 0.3909623799  | 0.1445476894  |
| C                        | 0.1090612527  | 1.3092204986  | 0.0437596241  |
| C                        | -1.0779681665 | 0.6070080412  | -0.2957685349 |
| C                        | -1.2040275040 | -0.6206954083 | 0.6470062665  |
| H                        | -0.7866437149 | -0.5081962076 | 1.6452418830  |
| H                        | -1.8760105482 | 0.9660784507  | -0.9308264945 |
| H                        | 0.2373520157  | 2.3820694248  | -0.0070021957 |
| H                        | -0.5824764461 | -1.3985436818 | -1.3296066366 |
| H                        | 2.2774006871  | 0.7751130642  | 0.3671067502  |

| <b>TSdisA</b>            |               |               |               |
|--------------------------|---------------|---------------|---------------|
| Energy = -246.6447218545 |               |               |               |
| Atom                     | X             | Y             | Z             |
| C                        | -0.0601591154 | 0.0520933818  | 0.0477439938  |
| C                        | -1.4487893971 | -0.2936068589 | -0.3816099154 |
| N                        | -2.2747988310 | 0.6722170289  | -0.4498371110 |
| C                        | -1.6475572304 | 1.8294360034  | -0.0463647154 |
| C                        | -0.1849264621 | 1.6054566074  | 0.3079429607  |
| C                        | 0.6649456344  | 1.0659617544  | -0.8102824022 |
| H                        | 1.7393403373  | 1.1583960158  | -0.8833271894 |
| H                        | 0.2688402873  | 2.1181107966  | 1.1469636519  |
| H                        | -2.1531740009 | 2.7798624530  | -0.0776577733 |
| H                        | 0.5067277709  | -0.6304264154 | 0.6683846702  |
| H                        | -1.7531929030 | -1.3048614671 | -0.6235520800 |

  

| <b>TSdisB</b>            |               |               |               |
|--------------------------|---------------|---------------|---------------|
| Energy = -246.6426425495 |               |               |               |
| Atom                     | X             | Y             | Z             |
| C                        | -0.1183253070 | 0.0850642067  | 0.0099609871  |
| N                        | -1.4115957513 | -0.3399738733 | -0.4616945934 |
| C                        | -2.1974039746 | 0.6550065245  | -0.4848330707 |
| C                        | -1.6315549586 | 1.9109504346  | -0.0351085177 |
| C                        | -0.1877402413 | 1.6310778120  | 0.3217005382  |
| C                        | 0.6467657979  | 1.0834016595  | -0.8191197192 |
| H                        | 1.7227520706  | 1.1555119018  | -0.8944422201 |
| H                        | 0.2818712352  | 2.1124984815  | 1.1700222916  |
| H                        | -2.1242836828 | 2.8691978729  | -0.0023981197 |
| H                        | 0.4200819489  | -0.6274624280 | 0.6202771154  |
| H                        | -3.2168182170 | 0.5473347278  | -0.8379115814 |

  

| <b>TSzezA</b>            |               |               |               |
|--------------------------|---------------|---------------|---------------|
| Energy = -246.6706773249 |               |               |               |
| Atom                     | X             | Y             | Z             |
| C                        | -0.0692462335 | -1.3266258734 | -0.3813242590 |
| C                        | 1.2127430941  | -0.6931232529 | 0.0540183847  |
| N                        | 1.2679566142  | 0.5664322872  | 0.1140161981  |
| C                        | 0.0636289618  | 1.2963340768  | -0.1209689959 |
| C                        | -1.2046625349 | 0.7638581508  | -0.0087071510 |
| C                        | -1.2346799939 | -0.7017643536 | 0.3006909782  |
| H                        | -1.5505173612 | -1.0178433519 | 1.2901571545  |
| H                        | -2.0746426673 | 1.4074128126  | 0.0036656469  |
| H                        | 0.2147640988  | 2.3548922838  | -0.2774702487 |
| H                        | -0.1608152673 | -1.3351353987 | -1.4692435678 |
| H                        | 2.1151766092  | -1.2633931209 | 0.2560077700  |

| <b>TSzzeB</b>               |               |               |               |
|-----------------------------|---------------|---------------|---------------|
| Energy = -246.6717885260    |               |               |               |
| Atom                        | X             | Y             | Z             |
| C                           | -0.1192479296 | -1.2620387537 | -0.3938771669 |
| N                           | 1.1832639594  | -0.8632400157 | 0.0536171946  |
| C                           | 1.2500759924  | 0.3974498933  | 0.0485611688  |
| C                           | 0.0767507208  | 1.3040475444  | -0.1762114005 |
| C                           | -1.2055656087 | 0.8259703167  | 0.0463793931  |
| C                           | -1.2438878449 | -0.6351495777 | 0.3407428657  |
| H                           | -1.5603964660 | -0.9675303992 | 1.3233503800  |
| H                           | -2.0488396629 | 1.4962991013  | 0.1579861234  |
| H                           | 0.2644455981  | 2.3608906226  | -0.3158983279 |
| H                           | -0.2107573458 | -1.1938954830 | -1.4778493525 |
| H                           | 2.1996006972  | 0.8684764008  | 0.2936438322  |
| <b>3,4-diaza-benzvalene</b> |               |               |               |
| Energy = -262.687219999     |               |               |               |
| Atom                        | X             | Y             | Z             |
| C                           | -0.1148126595 | 0.0632534895  | 0.0597705138  |
| N                           | -1.4875720542 | -0.3403444293 | -0.2411117579 |
| N                           | -2.1236388163 | 0.6679480140  | -0.4775395562 |
| C                           | -1.2137085943 | 1.8051824872  | -0.3487699961 |
| C                           | -0.1536329494 | 1.4553400161  | 0.7040026765  |
| C                           | 0.1959405537  | 1.3383295681  | -0.7353468002 |
| H                           | 0.9907703450  | 1.6903747723  | -1.3704493716 |
| H                           | 0.2765283987  | 1.9295671971  | 1.5695095627  |
| H                           | -1.5901106880 | 2.8006621626  | -0.5210249173 |
| H                           | 0.6144284093  | -0.6941103688 | 0.2983778147  |
| <b>pyridazine</b>           |               |               |               |
| Energy = -262.787905644     |               |               |               |
| Atom                        | X             | Y             | Z             |
| C                           | -0.0772849181 | -0.2507687104 | -0.3534786991 |
| N                           | -1.4048860034 | -0.3583077971 | -0.3880878683 |
| N                           | -2.1507893894 | 0.6704835455  | -0.2142075934 |
| C                           | -1.6154340895 | 1.8707444042  | 0.0050045037  |
| C                           | -0.2258199219 | 2.0978602766  | 0.0615157362  |
| C                           | 0.5931531002  | 0.9682764270  | -0.1293280449 |
| H                           | 1.6724016273  | 1.0184056361  | -0.1077776185 |
| H                           | 0.1735572743  | 3.0857349313  | 0.2414160047  |
| H                           | -2.3245900813 | 2.6749852748  | 0.1394459894  |
| H                           | 0.4647897667  | -1.1722951715 | -0.5106940380 |

| <b>TSconA'</b>          |               |               |               |
|-------------------------|---------------|---------------|---------------|
| Energy = -262.597450819 |               |               |               |
| Atom                    | X             | Y             | Z             |
| C                       | 0.0330564603  | 0.0812747518  | -0.0269456376 |
| N                       | 1.4141502674  | 0.2142561328  | 0.3474318209  |
| N                       | 1.6637519821  | 1.3857828896  | 0.5968088608  |
| C                       | 0.5819673295  | 2.3258854663  | 0.3493887801  |
| C                       | -0.6642151940 | 1.8051171407  | -0.0391244397 |
| H                       | -0.6219314367 | 0.6750689680  | 1.8980665430  |
| H                       | -1.3759436376 | 2.2777318311  | -0.7030933605 |
| H                       | 0.8891648570  | 3.3598351908  | 0.3191988273  |
| H                       | -0.1626688172 | -0.2396146717 | -1.0416751866 |
| <b>TSdisA'</b>          |               |               |               |
| Energy = -262.606104319 |               |               |               |
| Atom                    | X             | Y             | Z             |
| C                       | -0.1090163887 | 0.0892316296  | 0.0839662507  |
| N                       | -1.4228523455 | -0.2879911748 | -0.3984456464 |
| N                       | -2.2032176208 | 0.6669442892  | -0.4384675361 |
| C                       | -1.6262308911 | 1.8402669547  | 0.0039891207  |
| C                       | -0.1832266341 | 1.6258382729  | 0.3805012813  |
| C                       | 0.6581538950  | 1.0776100881  | -0.7494735277 |
| H                       | 1.7341965081  | 1.1381629599  | -0.8216787669 |
| H                       | 0.2594733901  | 2.1266412435  | 1.2308784613  |
| H                       | -2.1949914858 | 2.7535289654  | 0.0345692655  |
| H                       | 0.3966917429  | -0.6541908986 | 0.6834184278  |
| <b>zezA'</b>            |               |               |               |
| Energy = -262.627070911 |               |               |               |
| Atom                    | X             | Y             | Z             |
| C                       | 0.1430786560  | -0.0707148007 | -0.0263765456 |
| N                       | 1.4318356946  | 0.1758169949  | 0.5655010731  |
| N                       | 1.6435574545  | 1.3848878792  | 0.5155660270  |
| C                       | 0.5771938334  | 2.2964546491  | 0.1092729844  |
| C                       | -0.7734257745 | 2.0029974134  | 0.2099325569  |
| C                       | -0.9115879305 | 0.5662920445  | 0.6703237584  |
| H                       | -0.9944828520 | 0.4220202363  | 1.7448732713  |
| H                       | -1.5334129036 | 2.7738246327  | 0.1855215333  |
| H                       | 0.9450449115  | 3.2957076355  | -0.0732366433 |
| H                       | 0.1785356574  | 0.1105577725  | -1.0984065700 |

| <b>TSezA'</b>           |               |               |               |
|-------------------------|---------------|---------------|---------------|
| Energy = -262.624575354 |               |               |               |
| Atom                    | X             | Y             | Z             |
| C                       | 0.1430786560  | -0.0707148007 | -0.0263765456 |
| N                       | 1.4318356946  | 0.1758169949  | 0.5655010731  |
| N                       | 1.6435574545  | 1.3848878792  | 0.5155660270  |
| C                       | 0.5771938334  | 2.2964546491  | 0.1092729844  |
| C                       | -0.7734257745 | 2.0029974134  | 0.2099325569  |
| C                       | -0.9115879305 | 0.5662920445  | 0.6703237584  |
| H                       | -0.9944828520 | 0.4220202363  | 1.7448732713  |
| H                       | -1.5334129036 | 2.7738246327  | 0.1855215333  |
| H                       | 0.9450449115  | 3.2957076355  | -0.0732366433 |
| H                       | 0.1785356574  | 0.1105577725  | -1.0984065700 |
